# Supplementary material for: Crystal structures and photocatalytic properties of two novel iodoplumbate hybrids templated by multivalent organic cations
Source: Royal Society of Chemistry journal article supplement (doi:10.1039/c5nj01240f), 2015-01-01
Supplement: c5nj01240f1.pdf [file c5nj01240f1.pdf]

## Supporting Information

### Crystal structures and photocatalytic properties of two novel iodoplumbate hybrids templated by multivalent organic cation

Chao-Hai Wang,<sup>a</sup> Hai-Juan Du,<sup>a</sup> Yao Li,<sup>a</sup> Yun-Yin Niu<sup>a</sup>, Hong-Wei Hou<sup>a</sup>

**Table S1** Selected Bond Lengths (Å) and Bond Angles (°) for 1-2

| Compound 1               |            |                          |            |                                      |            |
|--------------------------|------------|--------------------------|------------|--------------------------------------|------------|
| Pb(1)-I(3)               | 3.1963(14) | Pb(1)-I(3)#1             | 3.1963(14) | Pb(1)-I(2)#1                         | 3.2010(14) |
| Pb(1)-I(2)               | 3.2010(14) | Pb(1)-I(1)#1             | 3.2342(13) | Pb(1)-I(1)                           | 3.2342(13) |
| Pb(2)-I(5)               | 3.0671(13) | Pb(2)-I(4)               | 3.1191(13) | Pb(2)-I(6)                           | 3.1523(15) |
| Pb(2)-I(3)               | 3.3792(16) | Pb(2)-I(1)#1             | 3.4282(15) | I(1)-Pb(2)#1                         | 3.4282(15) |
| I(3)-Pb(1)-I(3)#1        | 180.00(1)  | I(3)-Pb(1)-I(2)#1        | 86.09(3)   | I(3)#1-Pb(1)-I(2)#1                  | 93.91(3)   |
| I(3)-Pb(1)-I(2)          | 93.91(3)   | I(3)#1-Pb(1)-I(2)        | 86.09(3)   | I(2)#1-Pb(1)-I(2)                    | 180.00     |
| I(3)-Pb(1)-I(1)#1        | 86.99(2)   | I(3)#1-Pb(1)-I(1)#1      | 93.01(2)   | I(2)#1-Pb(1)-I(1)#1                  | 84.45(3)   |
| I(2)-Pb(1)-I(1)#1        | 95.55(3)   | I(3)-Pb(1)-I(1)          | 93.01(2)   | I(3)#1-Pb(1)-I(1)                    | 86.99(2)   |
| I(2)#1-Pb(1)-I(1)        | 95.55(3)   | I(2)-Pb(1)-I(1)          | 84.45(3)   | I(1)#1-Pb(1)-I(1)                    | 180.00     |
| I(5)-Pb(2)-I(4)          | 101.19(4)  | I(5)-Pb(2)-I(6)          | 89.29(3)   | I(4)-Pb(2)-I(6)                      | 90.53(3)   |
| I(5)-Pb(2)-I(3)          | 97.57(3)   | I(4)-Pb(2)-I(3)          | 86.28(3)   | I(6)-Pb(2)-I(3)                      | 172.87(2)  |
| I(5)-Pb(2)-I(1)#1        | 164.80(3)  | I(4)-Pb(2)-I(1)#1        | 93.85(3)   | I(6)-Pb(2)-I(1)#1                    | 92.77(3)   |
| I(3)-Pb(2)-I(1)#1        | 81.11(2)   | Pb(1)-I(1)-Pb(2)#1       | 79.93(2)   | Pb(1)-I(3)-Pb(2)                     | 81.21(2)   |
| Compound 2               |            |                          |            |                                      |            |
| Pb1-I1                   | 3.3353(14) | Pb1-I2                   | 2.9534(16) | Pb1-I3                               | 3.1628(16) |
| Pb1-I4                   | 3.1940(16) | Pb1-I5 <sup>1</sup>      | 3.3229(14) | Pb2-I1 <sup>2</sup>                  | 3.2712(15) |
| Pb2-I3                   | 3.1645(16) | Pb2-I4                   | 3.2195(15) | Pb2-I5                               | 3.2528(15) |
| Pb2-I6                   | 3.3190(14) | Pb2-I8 <sup>2</sup>      | 3.0994(15) | Pb3-I6                               | 3.1840(15) |
| Pb3-I7                   | 3.0139(17) | Pb3-I8                   | 3.2119(16) | Pb3-I9                               | 2.9937(17) |
| I1-Pb2 <sup>1</sup>      | 3.2713(15) | I5-Pb1 <sup>2</sup>      | 3.3229(14) | I8-Pb2 <sup>1</sup>                  | 3.0995(15) |
| I2-Pb1-I1                | 98.75(5)   | I2-Pb1-I3                | 89.71(5)   | I2-Pb1-I4                            | 94.72(5)   |
| I2-Pb1-I5 <sup>1</sup>   | 101.02(5)  | I3-Pb1-I1                | 96.01(4)   | I3-Pb1-I4                            | 90.46(4)   |
| I3-Pb1-I5 <sup>1</sup>   | 169.27(4)  | I4-Pb1-I1                | 165.07(4)  | I4-Pb1-I5 <sup>1</sup>               | 88.83(4)   |
| I5 <sup>1</sup> -Pb1-I1  | 82.30(3)   | I1 <sup>2</sup> -Pb2-I6  | 100.14(4)  | I3-Pb2-I1 <sup>2</sup>               | 91.31(4)   |
| I3-Pb2-I4                | 89.96(4)   | I3-Pb2-I5                | 175.01(4)  | I3-Pb2-I6                            | 83.23(4)   |
| I4-Pb2-I1 <sup>2</sup>   | 176.37(4)  | I4-Pb2-I5                | 94.20(4)   | I4-Pb2-I6                            | 83.39(4)   |
| I5-Pb2-I1 <sup>2</sup>   | 84.38(4)   | I5-Pb2-I6                | 99.97(4)   | I8 <sup>2</sup> -Pb2-I1 <sup>2</sup> | 86.66(4)   |
| I8 <sup>2</sup> -Pb2-I3  | 89.02(4)   | I8 <sup>2</sup> -Pb2-I4  | 89.96(4)   | I8 <sup>2</sup> -Pb2-I5              | 88.22(4)   |
| I8 <sup>2</sup> -Pb2-I6  | 169.77(4)  | I6-Pb3-I8                | 165.37(4)  | I7-Pb3-I6                            | 95.61(5)   |
| I7-Pb3-I8                | 94.79(5)   | I9-Pb3-I6                | 94.28(5)   | I9-Pb3-I7                            | 96.21(5)   |
| I9-Pb3-I8                | 94.78(5)   | Pb2 <sup>1</sup> -I1-Pb1 | 90.24(3)   | Pb1-I3-Pb2                           | 79.71(4)   |
| Pb1-I4-Pb2               | 78.43(3)   | Pb2-I5-Pb1 <sup>2</sup>  | 90.78(3)   | Pb3-I6-Pb2                           | 152.89(5)  |
| Pb2 <sup>1</sup> -I8-Pb3 | 85.68(4)   |                          |            |                                      |            |

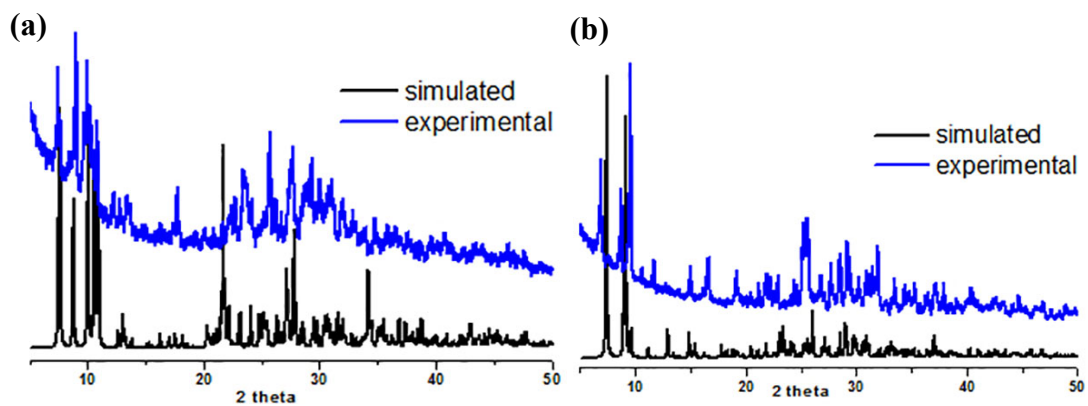

Fig.S1 X-ray powder diffraction pattern of complex 1-2, 1(a), 2(b)

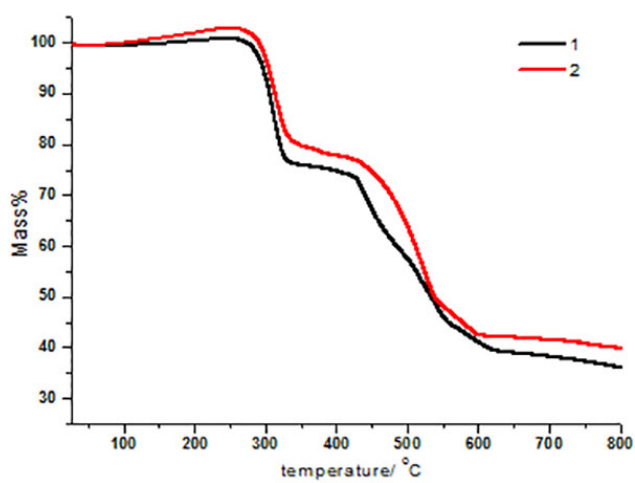

Fig.S2 TG plot of compounds 1 to 2

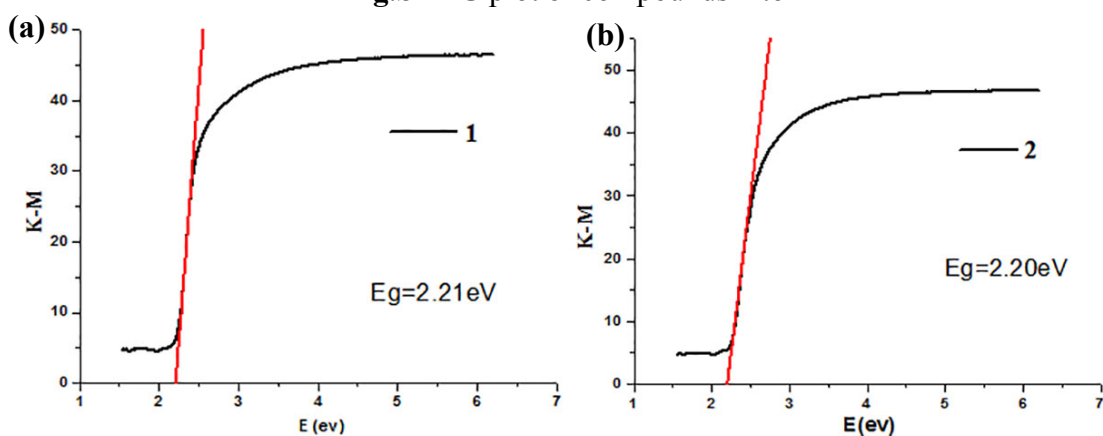

Fig.S3 K-M function versus energy (eV) curve of compounds 1-2

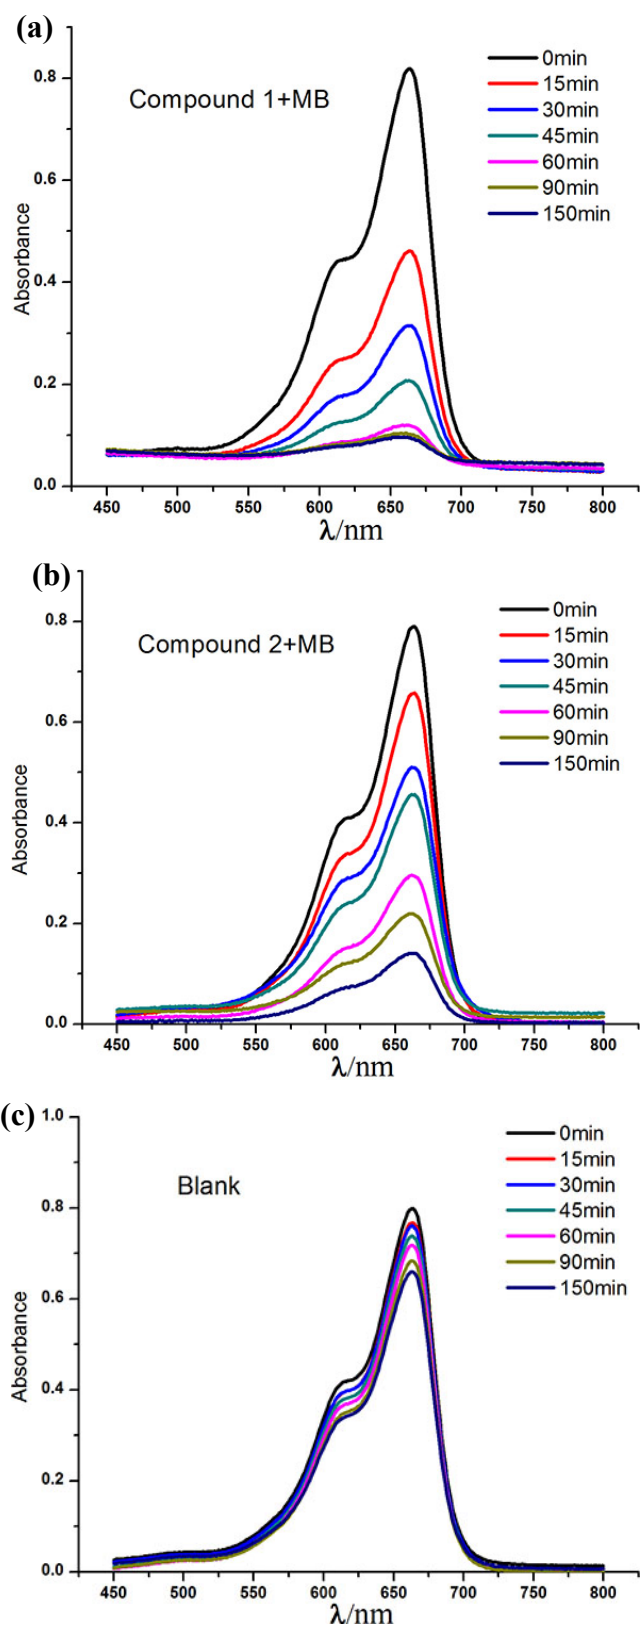

**Fig.S4** Absorption spectra of the MB solution during the decomposition reaction under UV light irradiation dealt with compounds **1** (a), **2** (b) and the control experiment without any catalyst (c)

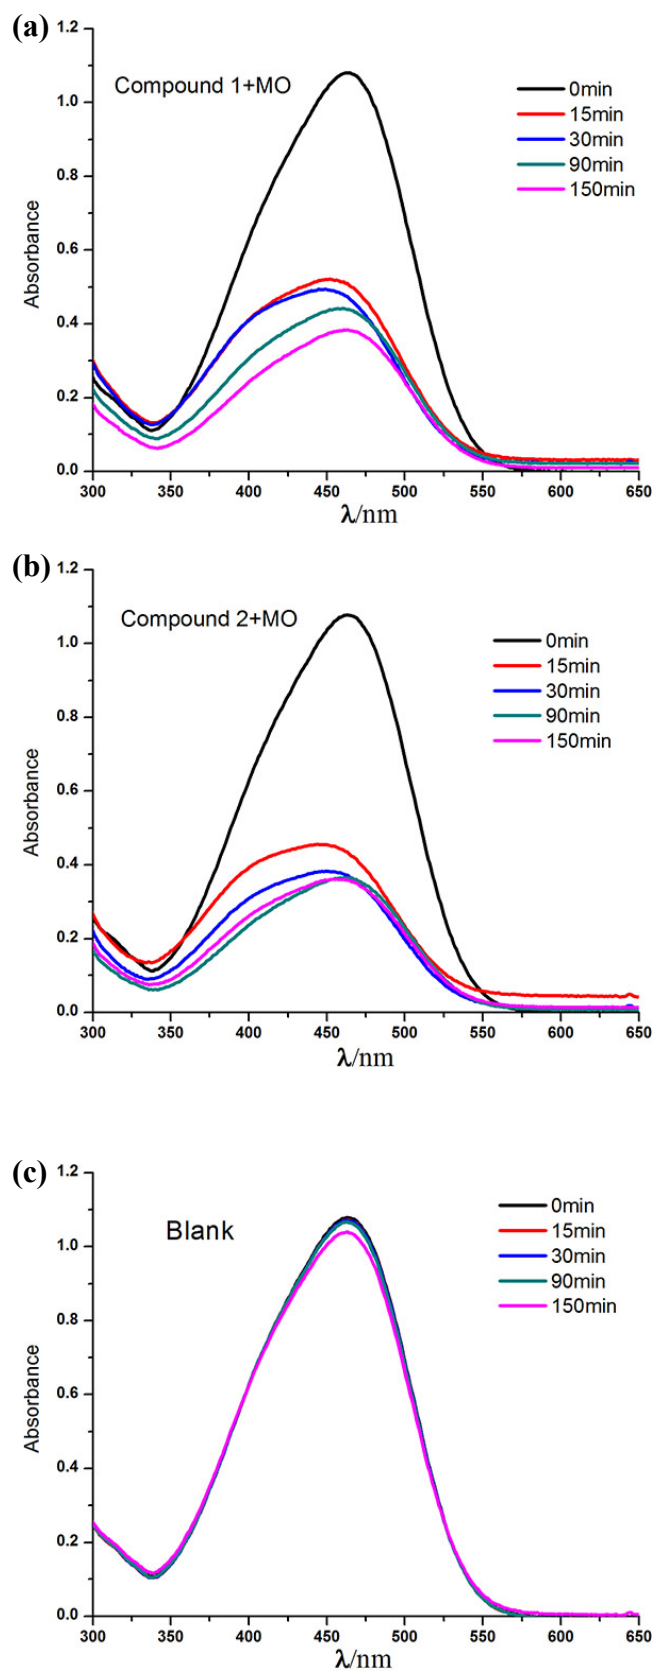

**Fig.S5** Absorption spectra of the MO solution during the decomposition reaction under UV light irradiation dealt with compounds **1** (a), **2** (b) and the control experiment without any catalyst (c)

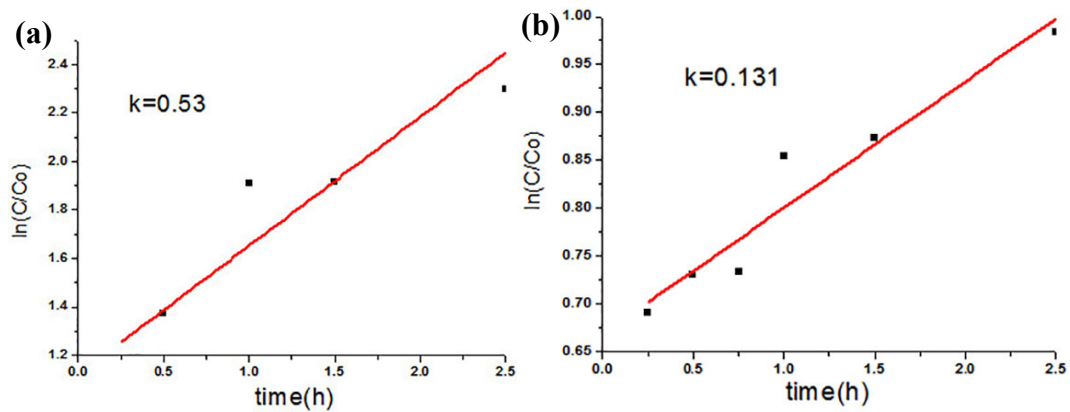

**Fig. S6** Kinetic study of 1(a), 2 (b) with MB

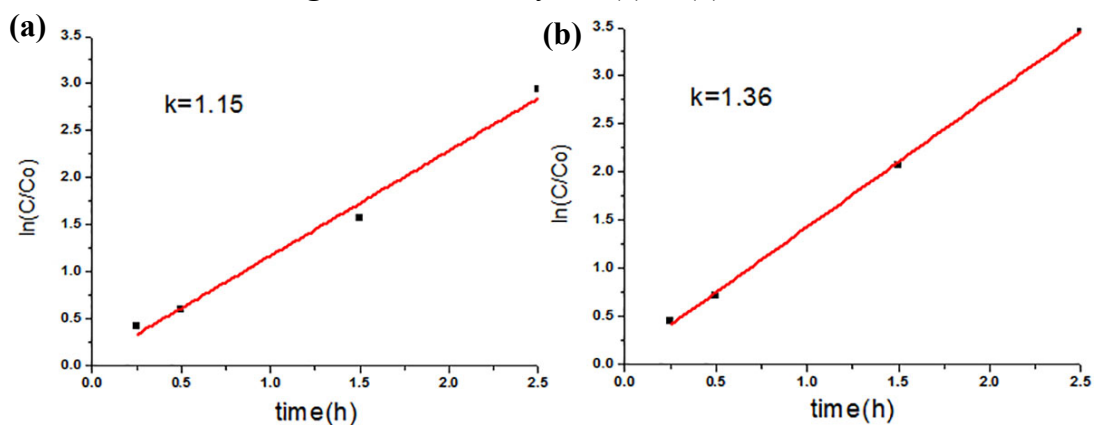

**Fig. S7** Kinetic study of 1(a),2 (b) with MO

(a)

(b)

**Fig. S8** Photocatalytic decomposition of MB solution (a), MO solution (b) under UV light irradiation with the use of  $PbI_2$ ,  $tbp$ ,  $tbpm$ , eparately.

**(a)**

**(b)**

**(c)**

**Fig.S9** Absorption spectra of the MB solution during the decomposition reaction under UV light irradiation dealt with  $\text{PbI}_2$  (a),  $\text{tbp}$ (b),  $\text{tbpm}$ (c)

**(a)**

**(b)**

**(c)**

**Fig.S10** Absorption spectra of the MO solution during the decomposition reaction under UV light irradiation dealt with  $\text{PbI}_2$  (a),  $\text{tbp}$ (b),  $\text{tbpm}$ (c)
